# Supplementary material for: Transcriptional consequences of XPA disruption in human cell lines
Source: PubMed Central journal article supplement — DNA Repair (Amst). Author manuscript; Available in PMC 2017 Dec 15. (PMC5731452; doi:10.1016/j.dnarep.2017.06.028), 2017-06-29
Supplement: NIHMS924458-supplement-Supplemental_Table_and_Figure.pdf [file NIHMS924458-supplement-Supplemental_Table_and_Figure.pdf]

**SUPPLEMENTAL TABLE 1.** Short Tandem Repeat (STR) fingerprinting report of cell lines used in the study.

| Sample Name | AMEL | CSF1PO | D16S539 | D18S51 | D21S11 | D3S1358 | D5S818 | D7S820 |
|-------------|------|--------|---------|--------|--------|---------|--------|--------|
| XP12ROSV    | X,Y  | 12     | 9,11    | 13,22  | 30.2   | 15,16   | 11,12  | 12     |
| XPAXP12ROSV | X,Y  | 12     | 9,11    | 13,22  | 30.2   | 15,16   | 11,12  | 12     |
| XP20SSV     | X    | 10,11  | 12      | 13,16  | 29,30  | 16      | 11     | 8,12   |
| XPAXP20SSV  | X    | 10,11  | 12      | 13,16  | 29,30  | 16      | 11     | 8,12   |
| KO142       | X    | 9,10   | 9,10    | 16     | 27,28  | 15,18   | 11,12  | 8,12   |
| KO38        | X    | 9,10   | 9,10    | 16     | 27,28  | 15,18   | 11,12  | 8,12   |
| HeLa S3     | X    | 9,10   | 9,10    | 16     | 27,28  | 15,18   | 11,12  | 8,12   |

The repeats of 8 STR fingerprinting markers are given. A total of 14 markers were used for the STR fingerprinting. All had matching scores for the pairs of cell lines, showing that the pairs are isogenic.

## Functional analysis of genes upregulated by RA -log(p-values) for each cell line pair

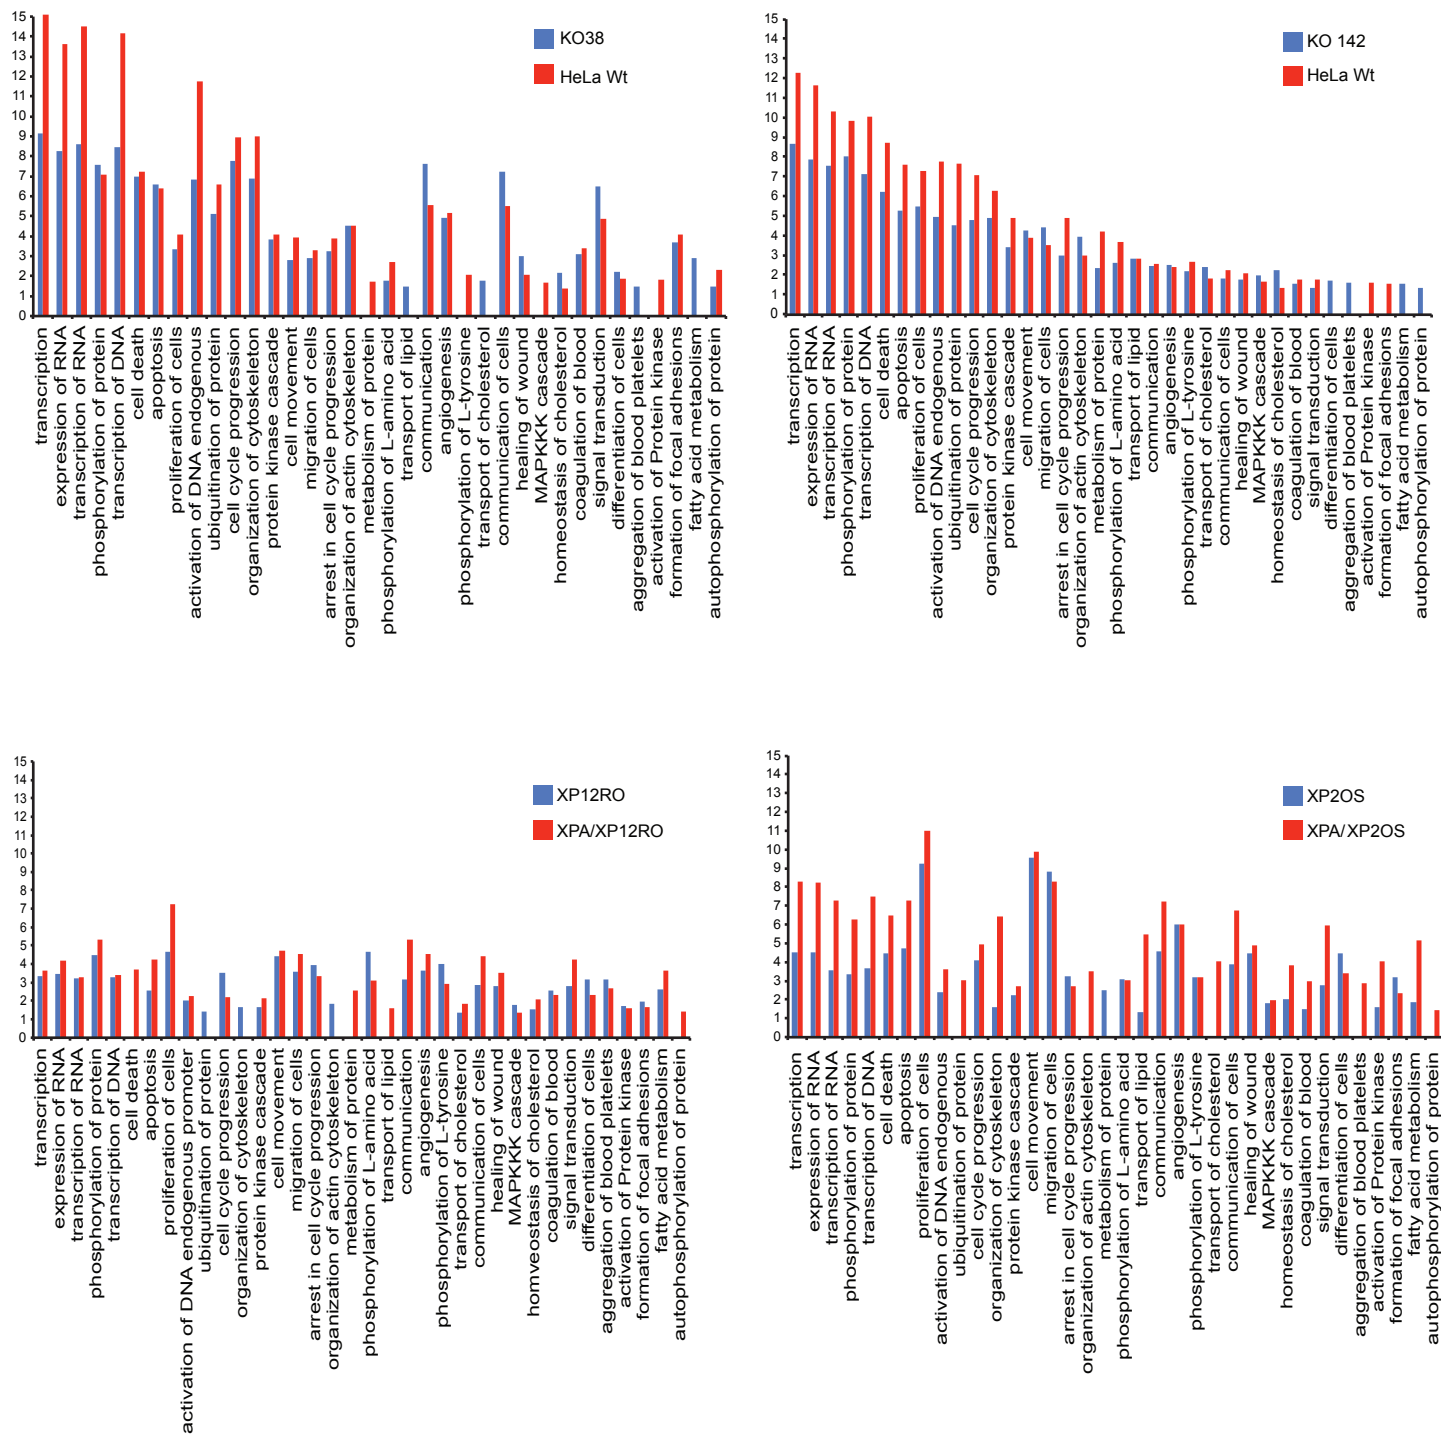

Figure S1
